# Supplementary material for: Morbidity among Adolescent Hypnotic Drug Users in Norway: An Observational Population-Based Study
Source: MDPI journal article supplement (doi:10.3390/jcm13041075), 2024-02-14
Supplement: s1 [file s1]

| Table S1                                                               |          |                   |
|------------------------------------------------------------------------|----------|-------------------|
| ATC codes and DDDs for the hypnotic drugs used by the study population |          |                   |
| Drug                                                                   | ATC code | 1 DDD (oral adm.) |
| nitrazepam                                                             | N05CD02  | 5 mg              |
| flunitrazepam                                                          | N05CD03  | 1 mg              |
| zopiclone                                                              | N05CF01  | 7.5 mg            |
| zolpidem                                                               | N05CF02  | 10 mg             |
| melatonin                                                              | N05CH01  | 2 mg              |
| alimemazine                                                            | R06AD01  | 30 mg             |
| ATC - Anatomical Therapeutic Chemical                                  |          |                   |
| DDD - Defined Daily Dose                                               |          |                   |

| Table S2                     |         |                                                                                                     |
|------------------------------|---------|-----------------------------------------------------------------------------------------------------|
| ICD-10 chapters, WHO version |         |                                                                                                     |
| Chapter                      | Block   | Description                                                                                         |
| I                            | A00-B99 | Certain infectious and parasitic diseases                                                           |
| II                           | C00-D48 | Neoplasms                                                                                           |
| III                          | D50-D89 | Diseases of the blood and blood-forming organs and certain disorders involving the immune mechanism |
| IV                           | E00-E90 | Endocrine, nutritional and metabolic diseases                                                       |
| V                            | F00-F99 | Mental and behavioral disorders                                                                     |
| VI                           | G00-G99 | Diseases of the nervous system                                                                      |
| VII                          | H00-H59 | Diseases of the eye and adnexa                                                                      |
| VIII                         | H60-H95 | Diseases of the ear and mastoid process                                                             |
| IX                           | I00-I99 | Diseases of the circulatory system                                                                  |
| X                            | J00-J99 | Diseases of the respiratory system                                                                  |
| XI                           | K00-K93 | Diseases of the digestive system                                                                    |
| XII                          | L00-L99 | Diseases of the skin and subcutaneous tissue                                                        |
| XIII                         | M00-M99 | Diseases of the musculoskeletal system and connective tissue                                        |
| XIV                          | N00-N99 | Diseases of the genitourinary system                                                                |
| XV                           | O00-O99 | Pregnancy, childbirth and the puerperium                                                            |
| XVI                          | P00-P96 | Certain conditions originating in the perinatal period                                              |
| XVII                         | Q00-Q99 | Congenital malformations, deformations and chromosomal abnormalities                                |
| XVIII                        | R00-R99 | Symptoms, signs and abnormal clinical and laboratory findings, not elsewhere classified             |
| XIX                          | S00-T98 | Injury, poisoning and certain other consequences of external causes                                 |
| XX                           | V01-Y98 | External causes of morbidity and mortality                                                          |
| XXI                          | Z00-Z99 | Factors influencing health status and contact with health services                                  |
| XXII                         | U00-U85 | Codes for special purposes                                                                          |
